# Supplementary material
Source: publisher site journal article supplement (https://www.dovepress.com/get_supplementary_file.php?f=supplementary_file_1_51969.pdf)
Supplement: Supplementary file 1 [file get_supplementary_file.php]

**Table 1. Unsupervised hierarchical clustering based on the variation of expression for each miRNA across the specimens**

|    | p-value   | Geom mean of intensities in Normal | Geom mean of intensities in Tumor | Fold-change | UniqueID       |
|----|-----------|------------------------------------|-----------------------------------|-------------|----------------|
| 1  | < 1e-07   | 8088.73                            | 248.87                            | 0.03        | hsa-miR-431    |
| 2  | < 1e-07   | 13935.67                           | 252.94                            | 0.02        | hsa-miR-379    |
| 3  | < 1e-07   | 23957.4                            | 315.27                            | 0.01        | hsa-miR-494    |
| 4  | < 1e-07   | 12995.35                           | 233.68                            | 0.02        | hsa-miR-432    |
| 5  | 1.00E-07  | 17813.87                           | 289.43                            | 0.02        | hsa-miR-134    |
| 6  | 2.00E-07  | 2367.6                             | 111.5                             | 0.05        | hsa-miR-409-5p |
| 7  | 5.00E-07  | 795.26                             | 2996.65                           | 3.77        | HS_52          |
| 8  | 6.00E-07  | 16484.85                           | 261.16                            | 0.02        | hsa-miR-409-3p |
| 9  | 1.10E-06  | 394.01                             | 12404.93                          | 31.48       | hsa-miR-96     |
| 10 | 1.70E-06  | 369.81                             | 21322.05                          | 57.66       | hsa-miR-106a   |
| 11 | 2.20E-06  | 21026.11                           | 440.48                            | 0.02        | hsa-miR-329    |
| 12 | 5.40E-06  | 13954.45                           | 338.28                            | 0.02        | hsa-miR-370    |
| 13 | 6.70E-06  | 244.97                             | 1232.44                           | 5.03        | hsa-miR-643    |
| 14 | 9.80E-06  | 1069.37                            | 19716.66                          | 18.44       | hsa-miR-378    |
| 15 | 1.14E-05  | 217.4                              | 12894.87                          | 59.31       | hsa-miR-141    |
| 16 | 1.21E-05  | 916.54                             | 3867.14                           | 4.22        | hsa-miR-182*   |
| 17 | 1.28E-05  | 715.52                             | 1832.76                           | 2.56        | HS_71.1        |
| 18 | 1.61E-05  | 11221.98                           | 468.22                            | 0.04        | hsa-miR-485-3p |
| 19 | 1.62E-05  | 11684.32                           | 180.3                             | 0.02        | hsa-miR-411    |
| 20 | 1.74E-05  | 189.95                             | 1700.73                           | 8.95        | hsa-miR-604    |
| 21 | 1.84E-05  | 1508.02                            | 29145.32                          | 19.33       | hsa-miR-200c   |
| 22 | 1.90E-05  | 461.96                             | 115                               | 0.25        | HS_155         |
| 23 | 2.07E-05  | 6324.22                            | 165.98                            | 0.03        | hsa-miR-299-5p |
| 24 | 2.15E-05  | 3096.69                            | 164.72                            | 0.05        | hsa-miR-487a   |
| 25 | 2.41E-05  | 5120.7                             | 200.96                            | 0.04        | hsa-miR-154    |
| 26 | 2.70E-05  | 127.56                             | 174.84                            | 1.37        | HS_144         |
| 27 | 2.75E-05  | 411.45                             | 637.89                            | 1.55        | HS_219         |
| 28 | 2.97E-05  | 3093.61                            | 7340.16                           | 2.37        | HS_96          |
| 29 | 3.54E-05  | 4468.74                            | 182.08                            | 0.04        | hsa-miR-382    |
| 30 | 4.43E-05  | 15196.39                           | 324.44                            | 0.02        | hsa-miR-487b   |
| 31 | 4.56E-05  | 671.98                             | 111.73                            | 0.17        | hsa-miR-770-5p |
| 32 | 4.70E-05  | 6383.3                             | 280.93                            | 0.04        | hsa-miR-495    |
| 33 | 5.42E-05  | 150.75                             | 184.18                            | 1.22        | hsa-miR-202    |
| 34 | 5.78E-05  | 128.34                             | 181.37                            | 1.41        | HS_267         |
| 35 | 6.12E-05  | 1197.27                            | 124.23                            | 0.1         | hsa-miR-376a*  |
| 36 | 6.24E-05  | 164.6                              | 271.17                            | 1.65        | HS_23          |
| 37 | 6.53E-05  | 3844.3                             | 169.43                            | 0.04        | hsa-miR-410    |
| 38 | 6.90E-05  | 246.76                             | 133.58                            | 0.54        | HS_58          |
| 39 | 7.25E-05  | 28342.14                           | 928.54                            | 0.03        | hsa-miR-155    |
| 40 | 7.91E-05  | 3122.03                            | 328.9                             | 0.11        | hsa-miR-433    |
| 41 | 8.61E-05  | 3423.28                            | 106.13                            | 0.03        | hsa-miR-655    |
| 42 | 8.71E-05  | 209.57                             | 480.97                            | 2.3         | HS_304_a       |
| 43 | 0.0001138 | 145.55                             | 209.09                            | 1.44        | hsa-miR-657    |
| 44 | 0.0001186 | 1528.94                            | 14423.67                          | 9.43        | hsa-miR-107    |
| 45 | 0.0001435 | 488.26                             | 1331.81                           | 2.73        | hsa-miR-449b   |
| 46 | 0.0001723 | 148.85                             | 273.71                            | 1.84        | hsa-miR-617    |
| 47 | 0.0001913 | 361.7                              | 8232.11                           | 22.76       | hsa-miR-363    |
| 48 | 0.0002471 | 4413.03                            | 176.25                            | 0.04        | hsa-miR-369-3p |
| 49 | 0.0002696 | 1251.25                            | 17875.8                           | 14.29       | hsa-miR-183    |
| 50 | 0.000284  | 6154.4                             | 314.57                            | 0.05        | hsa-miR-376a   |
| 51 | 0.0003026 | 1402.63                            | 4240.54                           | 3.02        | HS_244         |
| 52 | 0.000378  | 463.77                             | 3128.13                           | 6.75        | hsa-miR-579    |
| 53 | 0.0003983 | 22046.94                           | 33196.38                          | 1.51        | hsa-miR-30b    |
| 54 | 0.0004625 | 317.43                             | 3000.35                           | 9.45        | hsa-miR-375    |
| 55 | 0.0004938 | 121.01                             | 184.39                            | 1.52        | hsa-miR-623    |
| 56 | 0.000499  | 110.09                             | 154.67                            | 1.4         | hsa-miR-558    |
| 57 | 0.0005137 | 339.2                              | 176                               | 0.52        | hsa-miR-181d   |
| 58 | 0.0005188 | 670.56                             | 1419.11                           | 2.12        | HS_152         |
| 59 | 0.0005362 | 460.45                             | 938.57                            | 2.04        | HS_268         |
| 60 | 0.0006422 | 860.92                             | 121.99                            | 0.14        | hsa-miR-136    |
| 61 | 0.0006737 | 4842.27                            | 812.32                            | 0.17        | hsa-miR-381    |
| 62 | 0.0008639 | 351.21                             | 119.48                            | 0.34        | hsa-miR-432*   |
| 63 | 0.000934  | 510.84                             | 2028.93                           | 3.97        | hsa-miR-570    |
| 64 | 0.0010221 | 294.57                             | 634.79                            | 2.15        | hsa-miR-607    |
| 65 | 0.0010319 | 1913.8                             | 92.71                             | 0.05        | hsa-miR-656    |

|     |           |          |          |       |                |
|-----|-----------|----------|----------|-------|----------------|
| 66  | 0.0012024 | 99.35    | 109.79   | 1.11  | HS_107         |
| 67  | 0.0012073 | 522.63   | 1022.56  | 1.96  | HS_20          |
| 68  | 0.0012213 | 446.49   | 1068.4   | 2.39  | HS_186         |
| 69  | 0.0012728 | 341.86   | 7037.99  | 20.59 | hsa-miR-20b    |
| 70  | 0.0012793 | 7050.59  | 17605.53 | 2.5   | hsa-miR-500    |
| 71  | 0.0012861 | 1187.52  | 14772.03 | 12.44 | hsa-miR-101    |
| 72  | 0.001346  | 150.07   | 233.81   | 1.56  | hsa-miR-567    |
| 73  | 0.0013477 | 227.42   | 360.9    | 1.59  | HS_141         |
| 74  | 0.0013683 | 207.34   | 410.81   | 1.98  | hsa-miR-206    |
| 75  | 0.0013773 | 15607.34 | 703.87   | 0.05  | hsa-miR-218    |
| 76  | 0.0013819 | 284.64   | 4184.67  | 14.7  | hsa-miR-9      |
| 77  | 0.0017946 | 246.8    | 500.3    | 2.03  | HS_138         |
| 78  | 0.0019672 | 392.32   | 968.9    | 2.47  | HS_68          |
| 79  | 0.0020052 | 260.26   | 498.06   | 1.91  | HS_79.1        |
| 80  | 0.0021374 | 527.76   | 1531.81  | 2.9   | HS_113         |
| 81  | 0.0021546 | 12877.98 | 2573.45  | 0.2   | HS_243.1       |
| 82  | 0.0022191 | 587.58   | 1055.55  | 1.8   | HS_126         |
| 83  | 0.0022636 | 151.27   | 248.67   | 1.64  | HS_283_a       |
| 84  | 0.0022842 | 254.76   | 780.64   | 3.06  | HS_265.1       |
| 85  | 0.0024064 | 591.79   | 1585.62  | 2.68  | hsa-miR-105    |
| 86  | 0.0026072 | 113.91   | 224.19   | 1.97  | hsa-miR-521    |
| 87  | 0.0026927 | 1258.02  | 6489.63  | 5.16  | hsa-miR-769-3p |
| 88  | 0.002693  | 2294.81  | 19155.73 | 8.35  | hsa-miR-182    |
| 89  | 0.0028117 | 2022.06  | 244.28   | 0.12  | hsa-miR-154*   |
| 90  | 0.0028275 | 6191.4   | 27224.4  | 4.4   | hsa-miR-148a   |
| 91  | 0.0028995 | 267.23   | 657.95   | 2.46  | HS_160         |
| 92  | 0.0030017 | 6890.57  | 16701.36 | 2.42  | hsa-miR-149    |
| 93  | 0.0030141 | 175.21   | 328.21   | 1.87  | HS_26.1        |
| 94  | 0.003076  | 30296.86 | 39891.66 | 1.32  | hsa-miR-193b   |
| 95  | 0.0032358 | 566.21   | 128.98   | 0.23  | hsa-miR-496    |
| 96  | 0.0034948 | 1813.7   | 23769.22 | 13.11 | hsa-miR-19a    |
| 97  | 0.0035258 | 2322.85  | 11800.03 | 5.08  | hsa-miR-652    |
| 98  | 0.003561  | 205.45   | 7176.02  | 34.93 | hsa-miR-205    |
| 99  | 0.0038436 | 423.85   | 152.12   | 0.36  | HS_221         |
| 100 | 0.0039072 | 137.08   | 453.28   | 3.31  | hsa-miR-653    |
| 101 | 0.0042548 | 208.05   | 410.16   | 1.97  | HS_90          |
| 102 | 0.0043407 | 107.98   | 132.64   | 1.23  | HS_16          |
| 103 | 0.0044505 | 490.73   | 1397.28  | 2.85  | HS_97          |
| 104 | 0.0045107 | 194.55   | 307.47   | 1.58  | HS_14.1        |
| 105 | 0.0046548 | 183.41   | 537.9    | 2.93  | HS_131         |
| 106 | 0.0048506 | 1358.01  | 10602.27 | 7.81  | hsa-miR-18b    |
| 107 | 0.0048598 | 5112.92  | 697.24   | 0.14  | hsa-miR-539    |
| 108 | 0.0052122 | 1699.49  | 8388.72  | 4.94  | hsa-miR-660    |
| 109 | 0.0053777 | 1072.01  | 291.65   | 0.27  | hsa-miR-485-5p |
| 110 | 0.0058282 | 683.4    | 263.53   | 0.39  | hsa-miR-668    |
| 111 | 0.005856  | 387.12   | 2519.63  | 6.51  | hsa-miR-9*     |
| 112 | 0.005995  | 854.67   | 2553.26  | 2.99  | hsa-miR-517c   |
| 113 | 0.0061214 | 411.88   | 1632.14  | 3.96  | hsa-miR-451    |
| 114 | 0.0062516 | 150.13   | 94.31    | 0.63  | HS_77          |
| 115 | 0.006269  | 129.29   | 173.13   | 1.34  | HS_92          |
| 116 | 0.0065169 | 201.38   | 332.13   | 1.65  | hsa-miR-580    |
| 117 | 0.0067343 | 234.37   | 472.94   | 2.02  | hsa-miR-302a*  |
| 118 | 0.0067494 | 310.82   | 702.87   | 2.26  | hsa-miR-190    |
| 119 | 0.0071144 | 53940.07 | 50517.57 | 0.94  | hsa-miR-21     |
| 120 | 0.007418  | 165.39   | 212.89   | 1.29  | HS_75.1        |
| 121 | 0.0075495 | 3591.47  | 901.85   | 0.25  | hsa-miR-452*   |
| 122 | 0.0076376 | 41246.86 | 21842.79 | 0.53  | hsa-let-7i     |
| 123 | 0.0076812 | 24524    | 9053.11  | 0.37  | hsa-miR-152    |
| 124 | 0.0078478 | 395.3    | 1108.51  | 2.8   | HS_279_a       |
| 125 | 0.0079535 | 120.99   | 100.53   | 0.83  | HS_82.1        |
| 126 | 0.0081626 | 658.52   | 1438.73  | 2.18  | HS_184         |
| 127 | 0.0086351 | 142.35   | 4539.09  | 31.89 | hsa-miR-203    |
| 128 | 0.0088975 | 3531.51  | 16791.87 | 4.75  | hsa-miR-186    |
| 129 | 0.009301  | 477      | 1155.56  | 2.42  | HS_241.1       |
| 130 | 0.0093839 | 147.64   | 189.93   | 1.29  | HS_11.1        |
| 131 | 0.0093992 | 111.64   | 137.36   | 1.23  | hsa-miR-552    |
| 132 | 0.0095895 | 418.51   | 1026.67  | 2.45  | hsa-miR-636    |

|     |           |          |          |       |                |
|-----|-----------|----------|----------|-------|----------------|
| 133 | 0.00986   | 3092     | 11037.36 | 3.57  | hsa-miR-769-5p |
| 134 | 0.0102107 | 119.85   | 175.71   | 1.47  | HS_84          |
| 135 | 0.0102738 | 1780.66  | 4423.19  | 2.48  | hsa-miR-345    |
| 136 | 0.010525  | 94.33    | 888.24   | 9.42  | hsa-miR-551b   |
| 137 | 0.010883  | 4350.91  | 10510.59 | 2.42  | hsa-miR-34a    |
| 138 | 0.0110515 | 1912.81  | 3701.53  | 1.94  | hsa-miR-517a   |
| 139 | 0.0117807 | 107.07   | 141.29   | 1.32  | hsa-miR-367    |
| 140 | 0.0118724 | 8025.85  | 21992.51 | 2.74  | hsa-miR-425    |
| 141 | 0.0122724 | 118.98   | 418.26   | 3.52  | hsa-miR-33b    |
| 142 | 0.0130885 | 146.68   | 176.03   | 1.2   | hsa-miR-586    |
| 143 | 0.0133885 | 2596.41  | 310.5    | 0.12  | HS_250         |
| 144 | 0.0141937 | 45025.33 | 34589.38 | 0.77  | hsa-miR-222    |
| 145 | 0.014636  | 498.76   | 1287.99  | 2.58  | hsa-miR-191*   |
| 146 | 0.0148535 | 159.05   | 234.33   | 1.47  | HS_47          |
| 147 | 0.0149261 | 3327.69  | 7923.61  | 2.38  | hsa-miR-145    |
| 148 | 0.0149657 | 392.29   | 1349.08  | 3.44  | hsa-miR-133a   |
| 149 | 0.0151402 | 5674.79  | 38965.07 | 6.87  | hsa-miR-19b    |
| 150 | 0.0152284 | 5341.53  | 9023.43  | 1.69  | hsa-miR-505    |
| 151 | 0.0160896 | 4858.67  | 1142.59  | 0.24  | HS_284.1       |
| 152 | 0.0161691 | 350.42   | 118.25   | 0.34  | HS_72          |
| 153 | 0.0167136 | 242.39   | 332.52   | 1.37  | hsa-miR-519e   |
| 154 | 0.0179866 | 345.79   | 522.8    | 1.51  | HS_110         |
| 155 | 0.0181142 | 246.51   | 396.66   | 1.61  | HS_252.1       |
| 156 | 0.018454  | 2376.02  | 623.3    | 0.26  | hsa-miR-376b   |
| 157 | 0.0186178 | 1830.25  | 4090.68  | 2.24  | HS_260         |
| 158 | 0.018647  | 292.71   | 634.64   | 2.17  | hsa-miR-573    |
| 159 | 0.0188297 | 322.26   | 196.49   | 0.61  | HS_170         |
| 160 | 0.019244  | 1841.3   | 6026.63  | 3.27  | hsa-miR-550    |
| 161 | 0.0195239 | 399.14   | 7295.73  | 18.28 | hsa-miR-200a   |
| 162 | 0.0202036 | 28026.18 | 7362.9   | 0.26  | hsa-miR-181b   |
| 163 | 0.0203295 | 102.78   | 133.23   | 1.3   | hsa-miR-510    |
| 164 | 0.0216973 | 109.81   | 362.84   | 3.3   | HS_43.1        |
| 165 | 0.0217214 | 161.09   | 467.26   | 2.9   | hsa-miR-522    |
| 166 | 0.0219188 | 219.46   | 145.8    | 0.66  | HS_132.1       |
| 167 | 0.0220247 | 195.62   | 1984.25  | 10.14 | hsa-miR-200a*  |
| 168 | 0.0220759 | 468.47   | 670.85   | 1.43  | hsa-miR-507    |
| 169 | 0.0221147 | 220.38   | 280.51   | 1.27  | HS_45.1        |
| 170 | 0.0222887 | 340.81   | 708.15   | 2.08  | hsa-miR-603    |
| 171 | 0.0225339 | 926.74   | 2088.16  | 2.25  | HS_303_b       |
| 172 | 0.0227193 | 795.18   | 1352.37  | 1.7   | HS_19          |
| 173 | 0.0231849 | 195.99   | 156.54   | 0.8   | HS_4.1         |
| 174 | 0.0245932 | 448.92   | 2163.92  | 4.82  | hsa-miR-589    |
| 175 | 0.0252361 | 295.42   | 543.85   | 1.84  | hsa-miR-609    |
| 176 | 0.0262519 | 222.09   | 396.99   | 1.79  | hsa-miR-515-3p |
| 177 | 0.0263741 | 156.97   | 219.39   | 1.4   | hsa-miR-384    |
| 178 | 0.0267164 | 43182.18 | 14957.6  | 0.35  | hsa-miR-125b   |
| 179 | 0.0270593 | 313.21   | 524.25   | 1.67  | hsa-miR-646    |
| 180 | 0.0270687 | 110.12   | 93.21    | 0.85  | hsa-miR-373*   |
| 181 | 0.0275308 | 2932.48  | 6381.69  | 2.18  | HS_303_a       |
| 182 | 0.0276838 | 289.9    | 157.26   | 0.54  | hsa-miR-198    |
| 183 | 0.0290408 | 127.81   | 146.78   | 1.15  | HS_216         |
| 184 | 0.0295635 | 45935.63 | 9053.69  | 0.2   | hsa-miR-100    |
| 185 | 0.0313662 | 17909.73 | 7909.68  | 0.44  | HS_263.1       |
| 186 | 0.0314547 | 49336.68 | 41880.54 | 0.85  | hsa-miR-221    |
| 187 | 0.0324696 | 264.49   | 376.42   | 1.42  | HS_153         |
| 188 | 0.0328859 | 246.85   | 372.48   | 1.51  | HS_242         |
| 189 | 0.0330101 | 308.98   | 400.15   | 1.3   | hsa-miR-645    |
| 190 | 0.034152  | 153.14   | 123.08   | 0.8   | hsa-miR-488    |
| 191 | 0.0350724 | 297.5    | 597.82   | 2.01  | hsa-miR-592    |
| 192 | 0.0364851 | 205.19   | 171.73   | 0.84  | hsa-miR-631    |
| 193 | 0.0365887 | 43903.87 | 41690.67 | 0.95  | hsa-miR-25     |
| 194 | 0.0375811 | 163.67   | 201.68   | 1.23  | HS_201         |
| 195 | 0.0379641 | 3073.98  | 7383.11  | 2.4   | hsa-miR-326    |
| 196 | 0.0400477 | 743.05   | 1593.05  | 2.14  | hsa-miR-204    |
| 197 | 0.0401329 | 461.04   | 612.09   | 1.33  | HS_25          |
| 198 | 0.0406269 | 214.38   | 270.82   | 1.26  | HS_3           |
| 199 | 0.0406561 | 331.98   | 412.32   | 1.24  | hsa-miR-518c*  |

|     |           |          |          |      |                |
|-----|-----------|----------|----------|------|----------------|
| 200 | 0.0408391 | 125.7    | 106.91   | 0.85 | hsa-miR-658    |
| 201 | 0.0408439 | 198.47   | 143.72   | 0.72 | HS_35          |
| 202 | 0.0413325 | 128.13   | 151.91   | 1.19 | hsa-miR-633    |
| 203 | 0.0419364 | 184.33   | 258.8    | 1.4  | hsa-miR-634    |
| 204 | 0.043013  | 95.11    | 485.48   | 5.1  | hsa-miR-577    |
| 205 | 0.0431556 | 103.05   | 78.18    | 0.76 | hsa-miR-575    |
| 206 | 0.0436122 | 153.28   | 177.05   | 1.16 | HS_121         |
| 207 | 0.0438166 | 94.96    | 105.38   | 1.11 | hsa-miR-555    |
| 208 | 0.0450134 | 124.92   | 147.65   | 1.18 | HS_63          |
| 209 | 0.0450264 | 167.09   | 108.6    | 0.65 | hsa-miR-448    |
| 210 | 0.0451822 | 1206.22  | 418.82   | 0.35 | HS_193         |
| 211 | 0.045749  | 148.58   | 126.07   | 0.85 | hsa-miR-144    |
| 212 | 0.0461405 | 1029.71  | 3610.62  | 3.51 | hsa-miR-651    |
| 213 | 0.0462054 | 16619.49 | 30026.02 | 1.81 | hsa-miR-106b   |
| 214 | 0.0463334 | 30878.04 | 39999.47 | 1.3  | hsa-miR-30d    |
| 215 | 0.0476172 | 87.1     | 94.51    | 1.09 | hsa-miR-562    |
| 216 | 0.0491126 | 171.84   | 196.88   | 1.15 | hsa-miR-597    |
| 217 | 0.0492064 | 13576.58 | 4865.41  | 0.36 | hsa-miR-196b   |
| 218 | 0.0493094 | 1487.86  | 4644.63  | 3.12 | hsa-miR-642    |
| 219 | 0.0495958 | 1291.81  | 3497.56  | 2.71 | hsa-miR-212    |
| 220 | 0.0500698 | 37312.56 | 45862.14 | 1.23 | hsa-miR-30c    |
| 221 | 0.0510562 | 121.97   | 108.97   | 0.89 | HS_218         |
| 222 | 0.0513919 | 93.8     | 100.11   | 1.07 | hsa-miR-621    |
| 223 | 0.0518035 | 6508.5   | 21276.01 | 3.27 | hsa-miR-148b   |
| 224 | 0.0525149 | 179.72   | 307.35   | 1.71 | HS_8           |
| 225 | 0.0544498 | 12314.43 | 5616.26  | 0.46 | HS_22.1        |
| 226 | 0.0548636 | 1312.27  | 3174.86  | 2.42 | hsa-miR-627    |
| 227 | 0.0590134 | 321.16   | 658.94   | 2.05 | hsa-miR-187    |
| 228 | 0.0599245 | 560.89   | 303.46   | 0.54 | hsa-miR-299-3p |
| 229 | 0.0612368 | 308.34   | 116.45   | 0.38 | HS_111         |
| 230 | 0.0630863 | 146.99   | 187.12   | 1.27 | hsa-miR-613    |
| 231 | 0.0632582 | 287.78   | 94.15    | 0.33 | HS_55.1        |
| 232 | 0.0641716 | 20322.32 | 29203.8  | 1.44 | hsa-miR-99b    |
| 233 | 0.0656375 | 37660.45 | 32763.6  | 0.87 | hsa-miR-23b    |
| 234 | 0.0664964 | 104.73   | 117.37   | 1.12 | hsa-miR-630    |
| 235 | 0.0666197 | 139.79   | 429.29   | 3.07 | hsa-miR-593    |
| 236 | 0.0687951 | 326.67   | 1206.47  | 3.69 | hsa-miR-138    |
| 237 | 0.068882  | 28558.55 | 24591.08 | 0.86 | HS_192.1       |
| 238 | 0.0706654 | 76.6     | 79.62    | 1.04 | hsa-miR-606    |
| 239 | 0.0715769 | 36350.56 | 47062.1  | 1.29 | hsa-miR-20a    |
| 240 | 0.0716487 | 153.35   | 131.27   | 0.86 | hsa-miR-608    |
| 241 | 0.071763  | 164.31   | 140.97   | 0.86 | hsa-miR-506    |
| 242 | 0.0748037 | 257.76   | 438.48   | 1.7  | hsa-miR-618    |
| 243 | 0.0753444 | 278.85   | 463.05   | 1.66 | hsa-miR-302c*  |
| 244 | 0.0754728 | 271.67   | 170.69   | 0.63 | HS_182.1       |
| 245 | 0.0759829 | 1557.47  | 10441.7  | 6.7  | hsa-miR-200b   |
| 246 | 0.0764246 | 12983.71 | 19527.79 | 1.5  | hsa-miR-18a*   |
| 247 | 0.0768183 | 2879.97  | 1117.61  | 0.39 | HS_166.1       |
| 248 | 0.0777787 | 1109.05  | 507.82   | 0.46 | hsa-miR-377    |
| 249 | 0.0786413 | 80.66    | 90.16    | 1.12 | hsa-miR-184    |
| 250 | 0.0789586 | 10762.33 | 19349.75 | 1.8  | hsa-miR-185    |
| 251 | 0.0790043 | 1935.58  | 465.87   | 0.24 | HS_17          |
| 252 | 0.079052  | 22152.68 | 12694.86 | 0.57 | hsa-miR-10a    |
| 253 | 0.079831  | 99.76    | 135.48   | 1.36 | hsa-miR-520e   |
| 254 | 0.0804259 | 979.97   | 2369.74  | 2.42 | hsa-miR-641    |
| 255 | 0.0810116 | 192.46   | 292.06   | 1.52 | HS_119         |
| 256 | 0.0810156 | 401.79   | 281.12   | 0.7  | HS_33          |
| 257 | 0.0814416 | 549.8    | 943.46   | 1.72 | hsa-miR-372    |
| 258 | 0.0817971 | 1561.85  | 195.16   | 0.12 | hsa-miR-518e   |
| 259 | 0.0819561 | 6694.65  | 10877.58 | 1.62 | hsa-miR-126    |
| 260 | 0.0822534 | 49370.64 | 40983.89 | 0.83 | hsa-let-7a     |
| 261 | 0.0826456 | 525.71   | 790.83   | 1.5  | hsa-miR-554    |
| 262 | 0.0832031 | 7771.87  | 18874.04 | 2.43 | hsa-miR-421    |
| 263 | 0.0840344 | 358.73   | 179.77   | 0.5  | HS_206         |
| 264 | 0.0851992 | 6007.34  | 16232.21 | 2.7  | hsa-miR-324-5p |
| 265 | 0.085224  | 222.35   | 261.91   | 1.18 | HS_128         |
| 266 | 0.0869328 | 95.17    | 329.31   | 3.46 | hsa-miR-518f   |

|     |           |          |          |      |                |
|-----|-----------|----------|----------|------|----------------|
| 267 | 0.0896004 | 207.88   | 372.84   | 1.79 | hsa-miR-32     |
| 268 | 0.0945669 | 373.79   | 161.44   | 0.43 | HS_64          |
| 269 | 0.0945902 | 180.12   | 225.81   | 1.25 | HS_177         |
| 270 | 0.0946952 | 20433.58 | 6563.65  | 0.32 | hsa-miR-503    |
| 271 | 0.0951244 | 148.42   | 190.74   | 1.29 | hsa-miR-620    |
| 272 | 0.0961009 | 144.59   | 99.16    | 0.69 | hsa-miR-557    |
| 273 | 0.0989512 | 20865.41 | 29587.5  | 1.42 | hsa-miR-15a    |
| 274 | 0.0992395 | 145.27   | 164.05   | 1.13 | HS_49          |
| 275 | 0.1001137 | 27126.77 | 4257.56  | 0.16 | hsa-miR-224    |
| 276 | 0.1002102 | 34987.74 | 29777.76 | 0.85 | hsa-let-7e     |
| 277 | 0.1046028 | 149.82   | 107.37   | 0.72 | HS_278         |
| 278 | 0.1056675 | 37260.14 | 48378.24 | 1.3  | hsa-miR-191    |
| 279 | 0.1057056 | 95.75    | 298.25   | 3.11 | hsa-miR-515-5p |
| 280 | 0.1062697 | 653.26   | 198.09   | 0.3  | HS_174.1       |
| 281 | 0.1075223 | 269.02   | 198.67   | 0.74 | HS_280_b       |
| 282 | 0.1093995 | 168.5    | 190.35   | 1.13 | hsa-miR-325    |
| 283 | 0.1113377 | 34974.74 | 12469.32 | 0.36 | hsa-miR-424    |
| 284 | 0.1143529 | 319.08   | 118.61   | 0.37 | HS_112         |
| 285 | 0.1146086 | 175.27   | 104.03   | 0.59 | HS_55          |
| 286 | 0.1164641 | 403.75   | 543.41   | 1.35 | hsa-miR-614    |
| 287 | 0.1201155 | 347.46   | 224.91   | 0.65 | hsa-miR-453    |
| 288 | 0.1229248 | 174.08   | 140.03   | 0.8  | HS_109         |
| 289 | 0.1252729 | 1971.83  | 5065.37  | 2.57 | hsa-miR-551a   |
| 290 | 0.1257596 | 36585.57 | 27242.07 | 0.74 | hsa-let-7f     |
| 291 | 0.1260707 | 4135.14  | 7598.7   | 1.84 | hsa-miR-766    |
| 292 | 0.126243  | 534.83   | 173.93   | 0.33 | hsa-miR-638    |
| 293 | 0.1303989 | 23379.91 | 19626.23 | 0.84 | hsa-miR-29b    |
| 294 | 0.1311396 | 356.22   | 138.54   | 0.39 | HS_215         |
| 295 | 0.1332037 | 153.69   | 103.47   | 0.67 | HS_87          |
| 296 | 0.1336433 | 1673.17  | 507.99   | 0.3  | HS_163         |
| 297 | 0.135421  | 275.31   | 184.91   | 0.67 | HS_80          |
| 298 | 0.1359374 | 32117.31 | 14522.97 | 0.45 | hsa-let-7b     |
| 299 | 0.1372839 | 112.54   | 130.2    | 1.16 | HS_88          |
| 300 | 0.1394031 | 1879.19  | 6101.07  | 3.25 | hsa-miR-99a    |
| 301 | 0.1400252 | 4440.63  | 1015.66  | 0.23 | hsa-miR-624    |
| 302 | 0.1422566 | 583.2    | 153.06   | 0.26 | HS_18          |
| 303 | 0.1433221 | 176.11   | 315.95   | 1.79 | hsa-miR-561    |
| 304 | 0.1438204 | 304.86   | 180.65   | 0.59 | HS_257         |
| 305 | 0.144572  | 15368.95 | 20452.01 | 1.33 | hsa-miR-7      |
| 306 | 0.1461735 | 335.29   | 151.35   | 0.45 | HS_56          |
| 307 | 0.1483438 | 182.33   | 277.83   | 1.52 | hsa-miR-802    |
| 308 | 0.1486272 | 42443.71 | 35019.28 | 0.83 | hsa-let-7g     |
| 309 | 0.1488317 | 92.17    | 195.16   | 2.12 | hsa-miR-1      |
| 310 | 0.1498052 | 133.51   | 346.67   | 2.6  | hsa-miR-383    |
| 311 | 0.1510997 | 162.86   | 107.5    | 0.66 | HS_198         |
| 312 | 0.1545203 | 4616.95  | 23105.14 | 5    | hsa-miR-544    |
| 313 | 0.1558837 | 12040.14 | 25135.22 | 2.09 | hsa-miR-103    |
| 314 | 0.1591258 | 23855.99 | 11439.26 | 0.48 | hsa-miR-335    |
| 315 | 0.1592525 | 1329.81  | 3642.11  | 2.74 | hsa-miR-675    |
| 316 | 0.1593885 | 316.04   | 453.13   | 1.43 | HS_122.1       |
| 317 | 0.162127  | 422.78   | 288.46   | 0.68 | HS_175         |
| 318 | 0.1626918 | 329.11   | 141.21   | 0.43 | HS_117         |
| 319 | 0.1629911 | 93       | 263.59   | 2.83 | hsa-miR-599    |
| 320 | 0.1629945 | 12343.86 | 4880.61  | 0.4  | hsa-miR-10b    |
| 321 | 0.1634434 | 114.22   | 198.14   | 1.73 | hsa-miR-518c   |
| 322 | 0.1647424 | 114.54   | 127.93   | 1.12 | hsa-miR-553    |
| 323 | 0.170619  | 7641.17  | 18963.31 | 2.48 | hsa-miR-194    |
| 324 | 0.170711  | 735.7    | 417.71   | 0.57 | HS_116         |
| 325 | 0.1707122 | 783.95   | 272.29   | 0.35 | HS_254         |
| 326 | 0.1720102 | 934.42   | 160.53   | 0.17 | hsa-miR-569    |
| 327 | 0.1728951 | 628.2    | 312.05   | 0.5  | hsa-miR-563    |
| 328 | 0.1741307 | 142.38   | 153.36   | 1.08 | hsa-miR-649    |
| 329 | 0.175367  | 293.84   | 121.36   | 0.41 | HS_146.1       |
| 330 | 0.1769796 | 419.25   | 620.92   | 1.48 | HS_114         |
| 331 | 0.1811284 | 2491.1   | 10492.69 | 4.21 | hsa-miR-95     |
| 332 | 0.1827119 | 529.14   | 268.63   | 0.51 | HS_169         |
| 333 | 0.1838647 | 583.56   | 223.14   | 0.38 | hsa-miR-572    |

|     |           |          |          |      |                |
|-----|-----------|----------|----------|------|----------------|
| 334 | 0.1844993 | 227.94   | 287.48   | 1.26 | HS_197         |
| 335 | 0.1851552 | 548.43   | 275.18   | 0.5  | HS_305_b       |
| 336 | 0.1855969 | 491.14   | 158.29   | 0.32 | HS_76          |
| 337 | 0.1859683 | 6205.82  | 12924.46 | 2.08 | hsa-miR-192    |
| 338 | 0.188169  | 959.11   | 183.52   | 0.19 | hsa-miR-133b   |
| 339 | 0.1890387 | 661.57   | 922.16   | 1.39 | HS_24          |
| 340 | 0.1895407 | 89.48    | 96.41    | 1.08 | HS_264.1       |
| 341 | 0.1942571 | 217.57   | 157.35   | 0.72 | HS_37          |
| 342 | 0.1944319 | 206.32   | 247.52   | 1.2  | HS_65          |
| 343 | 0.1945453 | 4886.13  | 841.9    | 0.17 | hsa-miR-153    |
| 344 | 0.1960117 | 37495.76 | 22486.31 | 0.6  | hsa-miR-31     |
| 345 | 0.1962045 | 909.85   | 2241.94  | 2.46 | hsa-miR-215    |
| 346 | 0.1964469 | 26518.93 | 22082.42 | 0.83 | hsa-miR-197    |
| 347 | 0.1980919 | 225.85   | 185.14   | 0.82 | hsa-miR-568    |
| 348 | 0.1998991 | 734.63   | 199.52   | 0.27 | hsa-miR-622    |
| 349 | 0.2052273 | 1243.88  | 730.03   | 0.59 | hsa-miR-369-5p |
| 350 | 0.2054729 | 632.92   | 1178.34  | 1.86 | HS_262.1       |
| 351 | 0.2081491 | 12357.69 | 22997.29 | 1.86 | hsa-miR-130b   |
| 352 | 0.209398  | 13328.66 | 28659.35 | 2.15 | hsa-miR-18a    |
| 353 | 0.2105684 | 135.16   | 99.75    | 0.74 | HS_261.1       |
| 354 | 0.2139513 | 36089.2  | 33055.26 | 0.92 | HS_100         |
| 355 | 0.2158313 | 89.86    | 95.79    | 1.07 | hsa-miR-611    |
| 356 | 0.2181739 | 34351.73 | 31006.93 | 0.9  | hsa-miR-29a    |
| 357 | 0.2184074 | 141.55   | 182.6    | 1.29 | HS_59          |
| 358 | 0.2204411 | 122.99   | 142.87   | 1.16 | HS_95          |
| 359 | 0.2243229 | 16164.07 | 12072.52 | 0.75 | hsa-let-7c     |
| 360 | 0.2259911 | 907.04   | 1960.59  | 2.16 | hsa-miR-497    |
| 361 | 0.2269904 | 279.91   | 124.25   | 0.44 | hsa-miR-595    |
| 362 | 0.2309169 | 8157.88  | 2433.29  | 0.3  | hsa-miR-146a   |
| 363 | 0.2341829 | 87.36    | 79.1     | 0.91 | HS_183.1       |
| 364 | 0.2343381 | 138.24   | 253.69   | 1.84 | hsa-miR-519a   |
| 365 | 0.2356666 | 159.76   | 175.97   | 1.1  | hsa-miR-626    |
| 366 | 0.2373927 | 755.4    | 481.98   | 0.64 | hsa-miR-571    |
| 367 | 0.2396695 | 137.3    | 170.11   | 1.24 | HS_164         |
| 368 | 0.2403056 | 185.78   | 363.84   | 1.96 | hsa-miR-605    |
| 369 | 0.2410277 | 389.28   | 474.13   | 1.22 | HS_27          |
| 370 | 0.2434775 | 1202.97  | 411.02   | 0.34 | hsa-miR-302d   |
| 371 | 0.245392  | 32696.05 | 37363.69 | 1.14 | hsa-miR-27b    |
| 372 | 0.2464177 | 101.61   | 188.75   | 1.86 | hsa-miR-662    |
| 373 | 0.2465274 | 659.8    | 1452.3   | 2.2  | HS_287         |
| 374 | 0.2465452 | 30001.73 | 14917.18 | 0.5  | hsa-let-7d     |
| 375 | 0.2502223 | 126.5    | 133.16   | 1.05 | hsa-miR-587    |
| 376 | 0.2517312 | 157.87   | 109.59   | 0.69 | HS_140         |
| 377 | 0.2591927 | 1259.2   | 660.06   | 0.52 | HS_149         |
| 378 | 0.2605779 | 1484.99  | 536.4    | 0.36 | HS_108.1       |
| 379 | 0.265417  | 109.57   | 84.34    | 0.77 | hsa-miR-373    |
| 380 | 0.2671586 | 342.08   | 252.38   | 0.74 | HS_123         |
| 381 | 0.2677551 | 301.69   | 208.94   | 0.69 | hsa-miR-202*   |
| 382 | 0.2682639 | 466.66   | 307.58   | 0.66 | HS_147         |
| 383 | 0.2692089 | 526.98   | 726.36   | 1.38 | hsa-miR-150    |
| 384 | 0.2738639 | 1933.89  | 3742.45  | 1.94 | HS_239         |
| 385 | 0.2781067 | 24710.81 | 22698.52 | 0.92 | hsa-miR-324-3p |
| 386 | 0.2786238 | 104.46   | 96.09    | 0.92 | HS_154         |
| 387 | 0.2795531 | 841.92   | 322.54   | 0.38 | HS_31.1        |
| 388 | 0.2809284 | 158.71   | 181.96   | 1.15 | HS_273         |
| 389 | 0.2842555 | 193.85   | 118.29   | 0.61 | hsa-miR-639    |
| 390 | 0.2860375 | 2270.35  | 753.48   | 0.33 | hsa-miR-591    |
| 391 | 0.2865591 | 146.77   | 136.43   | 0.93 | HS_258         |
| 392 | 0.287693  | 92.44    | 98.44    | 1.06 | hsa-miR-526b*  |
| 393 | 0.2895664 | 1214.14  | 494.39   | 0.41 | hsa-miR-632    |
| 394 | 0.2914517 | 91.19    | 87.54    | 0.96 | HS_67          |
| 395 | 0.2948819 | 253.78   | 301.86   | 1.19 | hsa-miR-559    |
| 396 | 0.2969548 | 226.29   | 198.09   | 0.88 | HS_205.1       |
| 397 | 0.2982563 | 679.69   | 1531.12  | 2.25 | hsa-miR-143    |
| 398 | 0.3017791 | 290.13   | 500.61   | 1.73 | hsa-miR-135a   |
| 399 | 0.3023132 | 11674.65 | 7395.32  | 0.63 | hsa-miR-625    |
| 400 | 0.3042625 | 974.99   | 483.53   | 0.5  | hsa-miR-767-5p |

|     |           |          |          |      |                |
|-----|-----------|----------|----------|------|----------------|
| 401 | 0.3048424 | 132.95   | 119.56   | 0.9  | HS_159         |
| 402 | 0.3061443 | 789.21   | 546.35   | 0.69 | HS_285         |
| 403 | 0.306503  | 109.6    | 146.81   | 1.34 | hsa-miR-147    |
| 404 | 0.3070705 | 260.92   | 330.89   | 1.27 | hsa-miR-602    |
| 405 | 0.308748  | 1384.87  | 703.13   | 0.51 | hsa-miR-302b*  |
| 406 | 0.3117224 | 139.61   | 110.73   | 0.79 | hsa-miR-142-5p |
| 407 | 0.3144985 | 140.45   | 153.38   | 1.09 | HS_220         |
| 408 | 0.3149179 | 833.99   | 1325.25  | 1.59 | HS_99.1        |
| 409 | 0.3150364 | 477.88   | 295.67   | 0.62 | HS_120         |
| 410 | 0.31627   | 131.81   | 119.75   | 0.91 | HS_253         |
| 411 | 0.317636  | 106.27   | 96.59    | 0.91 | hsa-miR-489    |
| 412 | 0.3211695 | 266.79   | 158.82   | 0.6  | HS_135         |
| 413 | 0.3217022 | 1110.59  | 380.77   | 0.34 | hsa-miR-504    |
| 414 | 0.3218731 | 3001.47  | 1422.88  | 0.47 | hsa-miR-542-3p |
| 415 | 0.3232818 | 37793.79 | 41994.66 | 1.11 | hsa-miR-24     |
| 416 | 0.325091  | 248.13   | 304.68   | 1.23 | hsa-miR-581    |
| 417 | 0.3284818 | 373.68   | 213.8    | 0.57 | HS_74          |
| 418 | 0.3294588 | 124.25   | 139.02   | 1.12 | hsa-miR-519e*  |
| 419 | 0.3304072 | 685.3    | 534.84   | 0.78 | HS_196.1       |
| 420 | 0.3318729 | 621.25   | 755.51   | 1.22 | hsa-miR-564    |
| 421 | 0.3326328 | 243.34   | 279.79   | 1.15 | HS_282         |
| 422 | 0.3407184 | 1102.41  | 621.89   | 0.56 | hsa-miR-566    |
| 423 | 0.3412157 | 225.52   | 276.48   | 1.23 | hsa-miR-765    |
| 424 | 0.3454905 | 4269.55  | 2616.7   | 0.61 | HS_188         |
| 425 | 0.3460982 | 561.58   | 618.64   | 1.1  | HS_78          |
| 426 | 0.3464113 | 125.89   | 113.88   | 0.9  | hsa-miR-600    |
| 427 | 0.3486407 | 7767.09  | 16994.45 | 2.19 | hsa-miR-210    |
| 428 | 0.3513892 | 14077.47 | 8612.85  | 0.61 | hsa-miR-98     |
| 429 | 0.3574213 | 594.27   | 898.78   | 1.51 | HS_240         |
| 430 | 0.3589123 | 228.88   | 194.7    | 0.85 | HS_304_b       |
| 431 | 0.3593153 | 45595.88 | 43062.23 | 0.94 | hsa-miR-23a    |
| 432 | 0.3667365 | 110.35   | 125.93   | 1.14 | HS_1           |
| 433 | 0.3744254 | 202.98   | 178.21   | 0.88 | hsa-miR-511    |
| 434 | 0.3754249 | 1200.74  | 671.69   | 0.56 | HS_42          |
| 435 | 0.377062  | 193.58   | 239.35   | 1.24 | HS_13          |
| 436 | 0.3772565 | 296.36   | 249.5    | 0.84 | HS_7           |
| 437 | 0.3819949 | 160.83   | 203.31   | 1.26 | HS_93          |
| 438 | 0.3932646 | 1417.56  | 701.11   | 0.49 | HS_145.1       |
| 439 | 0.3967323 | 15797.75 | 21306.33 | 1.35 | hsa-miR-196a   |
| 440 | 0.3986387 | 3044.16  | 4841.49  | 1.59 | HS_32          |
| 441 | 0.3994128 | 400.01   | 489.83   | 1.22 | hsa-miR-223    |
| 442 | 0.4079106 | 26334.02 | 17642.5  | 0.67 | hsa-miR-130a   |
| 443 | 0.411411  | 152.3    | 189.56   | 1.24 | hsa-miR-498    |
| 444 | 0.4126705 | 151.57   | 132.22   | 0.87 | HS_211         |
| 445 | 0.4133654 | 39310.62 | 42813.47 | 1.09 | hsa-miR-27a    |
| 446 | 0.4150735 | 214.86   | 238.28   | 1.11 | hsa-miR-619    |
| 447 | 0.4179303 | 205.21   | 173.58   | 0.85 | HS_9           |
| 448 | 0.4186966 | 27761.49 | 29710.49 | 1.07 | hsa-miR-484    |
| 449 | 0.4232773 | 435.29   | 317.85   | 0.73 | HS_176         |
| 450 | 0.4245479 | 158.3    | 212.56   | 1.34 | HS_134         |
| 451 | 0.4249939 | 4861.11  | 3318.14  | 0.68 | hsa-miR-663    |
| 452 | 0.4288938 | 223.02   | 271.93   | 1.22 | HS_136         |
| 453 | 0.4293526 | 18189.3  | 16091.44 | 0.88 | hsa-miR-132    |
| 454 | 0.4308028 | 137.61   | 116.07   | 0.84 | hsa-miR-514    |
| 455 | 0.4372553 | 146.47   | 131.99   | 0.9  | hsa-miR-637    |
| 456 | 0.4413866 | 317.03   | 354.9    | 1.12 | HS_208         |
| 457 | 0.4453566 | 911.36   | 492.77   | 0.54 | hsa-miR-616    |
| 458 | 0.455384  | 288.38   | 167.81   | 0.58 | hsa-miR-512-5p |
| 459 | 0.4594209 | 8493.96  | 4249.53  | 0.5  | hsa-miR-584    |
| 460 | 0.4630445 | 205.27   | 344.2    | 1.68 | hsa-miR-519d   |
| 461 | 0.4667567 | 285.04   | 191.07   | 0.67 | HS_179         |
| 462 | 0.4749173 | 154.06   | 124.05   | 0.81 | hsa-miR-492    |
| 463 | 0.4763741 | 836.53   | 620.91   | 0.74 | hsa-miR-610    |
| 464 | 0.4804211 | 2037.52  | 1106.18  | 0.54 | hsa-miR-452    |
| 465 | 0.4806238 | 1013     | 801.15   | 0.79 | hsa-miR-585    |
| 466 | 0.4931356 | 144.94   | 135.2    | 0.93 | hsa-miR-767-3p |
| 467 | 0.4980578 | 269.99   | 299.88   | 1.11 | hsa-miR-412    |

|     |           |          |          |      |                |
|-----|-----------|----------|----------|------|----------------|
| 468 | 0.4988611 | 3062.14  | 3536.56  | 1.15 | HS_5.1         |
| 469 | 0.4994846 | 7199.26  | 3689.09  | 0.51 | hsa-miR-137    |
| 470 | 0.5100455 | 597.46   | 480.05   | 0.8  | HS_276.1       |
| 471 | 0.5102408 | 153.99   | 170.43   | 1.11 | hsa-miR-588    |
| 472 | 0.5160508 | 33267.76 | 34800.31 | 1.05 | hsa-miR-93     |
| 473 | 0.5245071 | 1597.26  | 1991.44  | 1.25 | HS_6           |
| 474 | 0.5291149 | 706.61   | 849.49   | 1.2  | hsa-miR-659    |
| 475 | 0.5338324 | 268.38   | 216      | 0.8  | HS_187         |
| 476 | 0.5348449 | 108.72   | 117.87   | 1.08 | hsa-miR-526b   |
| 477 | 0.5363753 | 742.9    | 882.83   | 1.19 | HS_48.1        |
| 478 | 0.536814  | 90.98    | 93.7     | 1.03 | hsa-miR-635    |
| 479 | 0.5382525 | 2015.47  | 3120.83  | 1.55 | hsa-miR-135b   |
| 480 | 0.5459111 | 128.68   | 115.99   | 0.9  | HS_217         |
| 481 | 0.5651005 | 341.26   | 464.36   | 1.36 | HS_280_a       |
| 482 | 0.590615  | 389.13   | 410.49   | 1.05 | HS_157         |
| 483 | 0.5918086 | 14101.83 | 9710.03  | 0.69 | hsa-miR-181a   |
| 484 | 0.6119217 | 199.47   | 178.01   | 0.89 | HS_89          |
| 485 | 0.6123195 | 9805.58  | 11653.11 | 1.19 | hsa-miR-126*   |
| 486 | 0.6217251 | 176.49   | 208.3    | 1.18 | HS_269         |
| 487 | 0.6254164 | 34056.62 | 33567.08 | 0.99 | hsa-miR-15b    |
| 488 | 0.6277949 | 15449.2  | 17655.71 | 1.14 | hsa-miR-365    |
| 489 | 0.6334627 | 233.78   | 262.34   | 1.12 | hsa-miR-517*   |
| 490 | 0.6348445 | 155.62   | 193.81   | 1.25 | HS_143         |
| 491 | 0.6367733 | 6086.67  | 5016.86  | 0.82 | hsa-miR-328    |
| 492 | 0.6447652 | 460.77   | 368.8    | 0.8  | hsa-miR-34b    |
| 493 | 0.6457851 | 150.12   | 135.31   | 0.9  | hsa-miR-302a   |
| 494 | 0.6501247 | 1785.25  | 2221.32  | 1.24 | hsa-miR-181c   |
| 495 | 0.6514966 | 571.22   | 311.66   | 0.55 | hsa-miR-363*   |
| 496 | 0.6627186 | 35495.98 | 37160.35 | 1.05 | hsa-miR-16     |
| 497 | 0.6640706 | 121.54   | 112.58   | 0.93 | HS_30          |
| 498 | 0.6664008 | 22877.72 | 21331.17 | 0.93 | hsa-miR-92b    |
| 499 | 0.6688709 | 119.23   | 122.9    | 1.03 | hsa-miR-648    |
| 500 | 0.6718867 | 815.2    | 639.52   | 0.78 | hsa-miR-542-5p |
| 501 | 0.6735909 | 124.05   | 121.35   | 0.98 | hsa-miR-601    |
| 502 | 0.6776956 | 82.63    | 80.55    | 0.97 | HS_283_b       |
| 503 | 0.6805693 | 15849.59 | 17463.48 | 1.1  | hsa-miR-29c    |
| 504 | 0.6855343 | 237.71   | 211.7    | 0.89 | hsa-miR-302b   |
| 505 | 0.6862954 | 2804.9   | 4857.02  | 1.73 | hsa-miR-429    |
| 506 | 0.6891297 | 91.55    | 89.29    | 0.98 | hsa-miR-422a   |
| 507 | 0.7030683 | 190.01   | 200      | 1.05 | HS_51          |
| 508 | 0.7058156 | 2215.36  | 2449.86  | 1.11 | HS_139         |
| 509 | 0.7073148 | 123.16   | 119.56   | 0.97 | hsa-miR-302c   |
| 510 | 0.7125733 | 452.32   | 350.99   | 0.78 | hsa-miR-545    |
| 511 | 0.7131502 | 308.77   | 284.8    | 0.92 | HS_231         |
| 512 | 0.7155596 | 148.5    | 141.63   | 0.95 | HS_156         |
| 513 | 0.7240339 | 109.96   | 105.09   | 0.96 | hsa-miR-650    |
| 514 | 0.733134  | 782.99   | 728.61   | 0.93 | HS_2           |
| 515 | 0.7425446 | 566.58   | 443.28   | 0.78 | HS_10          |
| 516 | 0.7527039 | 890.65   | 714.84   | 0.8  | hsa-miR-549    |
| 517 | 0.7539209 | 283.54   | 265.3    | 0.94 | hsa-miR-612    |
| 518 | 0.754749  | 129.99   | 131.35   | 1.01 | hsa-miR-644    |
| 519 | 0.7669066 | 363.55   | 392.52   | 1.08 | hsa-miR-647    |
| 520 | 0.7722177 | 169.38   | 162.28   | 0.96 | HS_127.1       |
| 521 | 0.7754647 | 23451.98 | 24944.1  | 1.06 | hsa-miR-22     |
| 522 | 0.7776259 | 1983.54  | 2294.49  | 1.16 | hsa-miR-340    |
| 523 | 0.7786172 | 121.84   | 118.31   | 0.97 | hsa-miR-640    |
| 524 | 0.7967262 | 112.02   | 109.59   | 0.98 | HS_101         |
| 525 | 0.7980355 | 987.46   | 1356.43  | 1.37 | hsa-miR-214    |
| 526 | 0.8096895 | 320.47   | 297.32   | 0.93 | HS_255         |
| 527 | 0.8145872 | 39499.55 | 40351.86 | 1.02 | hsa-miR-26a    |
| 528 | 0.8162795 | 311.31   | 273.65   | 0.88 | hsa-miR-142-3p |
| 529 | 0.8328373 | 33842.75 | 32962.25 | 0.97 | hsa-miR-26b    |
| 530 | 0.8395104 | 1720.28  | 1529.57  | 0.89 | hsa-miR-629    |
| 531 | 0.8426556 | 103.18   | 102.19   | 0.99 | HS_83.1        |
| 532 | 0.845737  | 193      | 200.13   | 1.04 | hsa-miR-523    |
| 533 | 0.8517837 | 150.69   | 146.37   | 0.97 | HS_85.1        |
| 534 | 0.8574724 | 243.2    | 227.13   | 0.93 | HS_104         |



|     |           |         |         |      |                |
|-----|-----------|---------|---------|------|----------------|
| 535 | 0.8598926 | 471.04  | 553.97  | 1.18 | hsa-miR-512-3p |
| 536 | 0.864604  | 304.66  | 293.59  | 0.96 | HS_21          |
| 537 | 0.8689903 | 155.84  | 151.87  | 0.97 | hsa-miR-217    |
| 538 | 0.8736609 | 435.32  | 452.16  | 1.04 | HS_199         |
| 539 | 0.873672  | 290.02  | 282.94  | 0.98 | HS_194         |
| 540 | 0.8839725 | 333.8   | 324.63  | 0.97 | hsa-miR-661    |
| 541 | 0.9005411 | 372.57  | 381.51  | 1.02 | hsa-miR-583    |
| 542 | 0.91846   | 319.22  | 326.94  | 1.02 | HS_200         |
| 543 | 0.9199338 | 1356.49 | 1396.09 | 1.03 | HS_94          |
| 544 | 0.9209868 | 153.19  | 148.46  | 0.97 | HS_46          |
| 545 | 0.9229657 | 146.66  | 144.28  | 0.98 | hsa-miR-520f   |
| 546 | 0.9296015 | 117.83  | 118.98  | 1.01 | HS_185.1       |
| 547 | 0.9342833 | 670.68  | 733.65  | 1.09 | hsa-miR-346    |
| 548 | 0.9437113 | 140.97  | 136.61  | 0.97 | HS_266.1       |
| 549 | 0.9477989 | 314.87  | 331.74  | 1.05 | hsa-miR-518b   |
| 550 | 0.9597042 | 2419.73 | 2532.38 | 1.05 | hsa-miR-598    |
| 551 | 0.9625438 | 1672.03 | 1648.91 | 0.99 | HS_150         |
| 552 | 0.9711523 | 144.22  | 142.3   | 0.99 | hsa-miR-520g   |
| 553 | 0.9731352 | 332.77  | 329.02  | 0.99 | hsa-miR-596    |
| 554 | 0.9763699 | 148.82  | 148.62  | 1    | hsa-miR-211    |
| 555 | 0.9764623 | 5333.45 | 5245    | 0.98 | hsa-miR-195    |
| 556 | 0.9824371 | 313.85  | 314.99  | 1    | hsa-miR-578    |
